# Supplementary material
Source: HighWire-hosted journal article supplement (https://jpet.aspetjournals.org/highwire/filestream/147027/field_highwire_adjunct_files/0/263459SupplData.pdf)
Supplement: 263459SupplData.pdf [file 263459SupplData.pdf]

## **Supplementary Information**

Hepatic Transporter Alterations by Nuclear Receptor Agonist T0901317 in Sandwich-cultured Human Hepatocytes: Proteomic Analysis and PBPK Modeling to Evaluate Drug-Drug Interaction Risk

Katsuaki Ito, Noora Sjöstedt, Melina M. Malinen, Cen Guo and Kim L.R. Brouwer

*Division of Pharmacotherapy and Experimental Therapeutics, UNC Eshelman School of Pharmacy, University of North Carolina at Chapel Hill, Chapel Hill, NC (K.I., N.S., M.M.M., C.G., K.L.R.B.);*

*DMPK Research Department, Teijin Pharma Limited, Hino, Tokyo, Japan (K.I.)*

**Supplementary Table 1.** Signature peptides selected for proteomic analysis of transporter proteins. Bold letters indicate amino acids labeled with stable isotope (<sup>13</sup>C and <sup>15</sup>N).

| Gene Symbol                   | Alias   | Analyte<br>or IS | Signature Peptide       | Parent Ion | Product Ions |       |       |                                        | Peptide No. |
|-------------------------------|---------|------------------|-------------------------|------------|--------------|-------|-------|----------------------------------------|-------------|
|                               |         |                  |                         |            | 1            | 2     | 3     | 4                                      |             |
| <b><i>SLC Transporter</i></b> |         |                  |                         |            |              |       |       |                                        |             |
| <i>SLC10A1</i>                | NTCP    | Analyte          | GIYDGLK                 | 440.7      | 710.3        | 547.3 | 260.2 | 432.2                                  | -           |
|                               |         | IS               | <b>GIYDGLK</b>          | 444.7      | 718.3        | 555.3 | 268.2 | 440.3                                  |             |
| <i>SLC01B1</i>                | OATP1B1 | Analyte          | NVTGFFQSFK              | 587.8      | 381.2        | 656.3 | 860.4 | 961.5                                  | Peptide 1   |
|                               |         | IS               | <b>NVTGFFQSFK</b>       | 591.8      | 389.2        | 664.4 | 868.4 | 969.5                                  |             |
|                               |         | Analyte          | YVEQQYGQPSSK            | 707.3      | 234.1        | 418.2 | 603.3 | 766.4                                  | Peptide 2   |
|                               |         | IS               | <b>YVEQQYGQPSSK</b>     | 711.3      | 242.2        | 426.2 | 611.3 | 774.4                                  |             |
| <i>SLC01B3</i>                | OATP1B3 | Analyte          | NVTGFFQSLK              | 570.8      | 826.4        | 927.5 | 347.2 | 622.4 <sup>a</sup> /769.4 <sup>b</sup> | -           |
|                               |         | IS               | <b>NVTGFFQSLK</b>       | 574.8      | 834.5        | 935.5 | 355.2 | 630.4 <sup>a</sup> /777.4 <sup>b</sup> |             |
| <i>SLC02B1</i>                | OATP2B1 | Analyte          | SSPAVEQQLLVSGPGK        | 798.9      | 544.3        | 445.2 | 358.2 | 301.2                                  | -           |
|                               |         | IS               | <b>SSPAVEQQLLVSGPGK</b> | 802.9      | 552.3        | 453.3 | 366.2 | 309.2                                  |             |
| <i>SLC22A1</i>                | OCT1    | Analyte          | LSPSFADLFR              | 576.8      | 952.5        | 621.3 | 768.4 | 435.3                                  | -           |
|                               |         | IS               | <b>LSPSFADLFR</b>       | 581.8      | 962.5        | 631.3 | 778.4 | 445.3                                  |             |
| <i>SLC22A3</i>                | OCT3    | Analyte          | FLQGVFGK                | 448.3      | 635.4        | 507.3 | 351.2 | 204.1                                  | -           |
|                               |         | IS               | <b>FLQGVFGK</b>         | 452.3      | 643.4        | 515.3 | 359.2 | 212.1                                  |             |
| <i>SLC22A7</i>                | OAT2    | Analyte          | NVALLALPR               | 483.8      | 456.3        | 569.4 | 682.5 | 753.5                                  | -           |
|                               |         | IS               | <b>NVALLALPR</b>        | 488.8      | 466.3        | 579.4 | 692.5 | 763.5                                  |             |

|                        |              |         |                 |       |       |        |       |       |           |
|------------------------|--------------|---------|-----------------|-------|-------|--------|-------|-------|-----------|
| SLC47A1                | MATE1        | Analyte | GGPEATLEVR      | 514.8 | 688.4 | 617.4  | 516.3 | 274.2 | -         |
|                        |              | IS      | GGPEATLEVR      | 519.8 | 698.4 | 627.4  | 526.3 | 284.2 |           |
| SLC51A                 | OST $\alpha$ | Analyte | YTADLLEVLK      | 582.8 | 601.4 | 829.5  | 900.5 | 260.2 | -         |
|                        |              | IS      | YTADLLEVLK      | 586.8 | 609.4 | 837.5  | 908.6 | 268.2 |           |
| SLC51B                 | OST $\beta$  | Analyte | DVLSVFLPDVPETES | 823.9 | 873.4 | 562.2  | 986.5 | 336.1 | -         |
|                        |              | IS      | DVLSVFLPDVPETES | 826.9 | 879.4 | 562.2  | 992.5 | 336.1 |           |
| <b>ABC Transporter</b> |              |         |                 |       |       |        |       |       |           |
| ABCB1                  | MDR1         | Analyte | IATEAIENFR      | 582.3 | 749.4 | 678.4  | 565.3 | 979.5 | -         |
|                        |              | IS      | IATEAIENFR      | 587.3 | 759.4 | 688.4  | 575.3 | 989.5 |           |
| ABCB4                  | MDR3         | Analyte | IATEAIENIR      | 565.3 | 644.4 | 945.5  | 715.4 | 531.3 | -         |
|                        |              | IS      | IATEAIENIR      | 570.3 | 654.4 | 955.5  | 725.4 | 541.3 |           |
| ABCB11                 | BSEP         | Analyte | STALQLIQR       | 515.3 | 841.5 | 529.3  | 770.5 | 657.4 | Peptide 1 |
|                        |              | IS      | STALQLIQR       | 520.3 | 851.5 | 539.4  | 780.5 | 667.4 |           |
|                        |              | Analyte | STSIQLLER       | 523.8 | 530.3 | 858.5  | 658.4 | 417.2 | Peptide 2 |
|                        |              | IS      | STSIQLLER       | 528.8 | 540.3 | 868.5  | 668.4 | 427.3 |           |
| ABCC2                  | MRP2         | Analyte | LTIIQDPILFSGSLR | 885.5 | 666.4 | 1329.7 | 989.6 | 519.3 | -         |
|                        |              | IS      | LTIIQDPILFSGSLR | 890.5 | 676.4 | 1339.7 | 999.6 | 529.3 |           |
| ABCC3                  | MRP3         | Analyte | ADGALTQEEK      | 531.3 | 634.3 | 747.4  | 875.4 | 533.3 | Peptide 1 |
|                        |              | IS      | ADGALTQEEK      | 535.3 | 642.3 | 755.4  | 883.5 | 541.3 |           |
|                        |              | Analyte | AEGEISDPFR      | 560.8 | 419.2 | 920.4  | 175.1 | 621.3 | Peptide 2 |
|                        |              | IS      | AEGEISDPFR      | 565.8 | 429.2 | 930.5  | 185.1 | 631.3 |           |
| ABCC4                  | MRP4         | Analyte | AEEAALTETAK     | 538.3 | 875.5 | 733.4  | 662.4 | 549.3 | -         |
|                        |              | IS      | AEEAALTETAK     | 542.3 | 883.5 | 741.4  | 670.4 | 557.3 |           |

|              |      |         |            |       |       |       |       |       |           |
|--------------|------|---------|------------|-------|-------|-------|-------|-------|-----------|
| <i>ABCG2</i> | BCRP | Analyte | SSLLDVLAAR | 522.8 | 644.4 | 757.5 | 529.3 | 430.3 | Peptide 1 |
|              |      | IS      | SSLLDVLAAR | 527.8 | 654.4 | 767.5 | 539.4 | 440.3 |           |
|              |      | Analyte | ENLQFSAALR | 574.8 | 664.4 | 517.3 | 792.4 | 359.2 | Peptide 2 |
|              |      | IS      | ENLQFSAALR | 579.8 | 674.4 | 527.3 | 802.4 | 369.2 |           |

<sup>a</sup>Used for hepatocyte lot 1 and 3

<sup>b</sup>Used for hepatocyte lot 2

**Supplementary Table 2.**

Gradient condition for OCT1

| Time (min) | Percent B |
|------------|-----------|
| 0          | 5         |
| 1          | 5         |
| 25         | 60        |
| 25.5       | 90        |
| 30         | 90        |
| 32         | 5         |
| 42         | 5         |

Gradient condition for the other transporters

| Time (min) | Percent B |
|------------|-----------|
| 0          | 5         |
| 1          | 5         |
| 25         | 35        |
| 25.5       | 90        |
| 30         | 90        |
| 32         | 5         |
| 42         | 5         |
